# Supplementary material for: Factors influencing undernutrition among children under 5 years from cocoa-growing communities in Bougainville
Source: PubMed Central journal article supplement — BMJ Glob Health. 2020 Aug 25;5(8):e002478. doi: 10.1136/bmjgh-2020-002478 (PMC7449357; doi:10.1136/bmjgh-2020-002478), 2020-08-25
Supplement: bmjgh-2020-002478supp001.pdf [file bmjgh-2020-002478supp001.pdf]

## Supplementary Materials- Full models

Table 5 Multi-level [logistic regression analysis](#) for child stunting and community-households- and individual-level factors.

| Factor                  | Null model |        |         | Model 1 |        |         | Model 2 |               |         |
|-------------------------|------------|--------|---------|---------|--------|---------|---------|---------------|---------|
|                         | aOR        | 95% CI | p-value | aOR     | 95% CI | p-value | aOR     | 95% CI        | p-value |
| <b>Individual Level</b> |            |        |         |         |        |         |         |               |         |
| Child's birth order     |            |        |         |         |        |         |         |               |         |
| First                   |            |        |         |         |        |         |         |               |         |
| Second                  |            |        |         |         |        |         |         |               |         |
| ≥Third                  |            |        |         |         |        |         |         |               |         |
| Sex of child            |            |        |         |         |        |         |         |               |         |
| Female                  |            |        |         |         |        |         |         |               |         |
| Male                    |            |        |         |         |        |         |         |               |         |
| Child's age             |            |        |         |         |        |         |         |               |         |
| 0-5 months              |            |        |         |         |        |         | 1.00    |               |         |
| 6-23 months             |            |        |         |         |        |         | 3.27    | (1.57- 6.78)  | <0.01   |
| 24-59 months            |            |        |         |         |        |         | 2.82    | ( 1.40- 5.67) | <0.01   |
| Ever breastfed          |            |        |         |         |        |         |         |               |         |
| No                      |            |        |         |         |        |         |         |               |         |
| Yes                     |            |        |         |         |        |         |         |               |         |
| Diarrhoea past 2 weeks  |            |        |         |         |        |         |         |               |         |
| No                      |            |        |         |         |        |         | 1.00    |               |         |
| yes                     |            |        |         |         |        |         | 0.51    | (0.24- 1.08)  | 0.08    |
| <b>Household Level</b>  |            |        |         |         |        |         |         |               |         |
| Wealth quintiles        |            |        |         |         |        |         |         |               |         |
| Lowest                  |            |        |         |         |        |         |         |               |         |
| Second                  |            |        |         |         |        |         |         |               |         |

|                          |  |      |              |      |      |              |
|--------------------------|--|------|--------------|------|------|--------------|
| Third                    |  |      |              |      |      |              |
| Fourth                   |  |      |              |      |      |              |
| Highest                  |  |      |              |      |      |              |
| No. Household members    |  |      |              |      |      |              |
| ≤5                       |  |      |              |      |      |              |
| >5                       |  |      |              |      |      |              |
| Food Security            |  |      |              |      |      |              |
| Food Insecure            |  |      |              |      |      |              |
| Food Secure              |  |      |              |      |      |              |
| Drinking water source    |  |      |              |      |      |              |
| Improved                 |  |      |              |      |      |              |
| Unimproved               |  |      |              |      |      |              |
| Toilet facility          |  |      |              |      |      |              |
| Improved                 |  | 1.00 |              |      | 1.00 |              |
| Unimproved               |  | 1.68 | (1.12- 2.50) | 0.01 | 1.71 | (1.14- 2.55) |
| Maternal education level |  |      |              |      |      | 0.01         |
| Primary or lower         |  |      |              |      |      |              |
| Highschool or higher     |  |      |              |      |      |              |
| Paternal education level |  |      |              |      |      |              |
| Primary or lower         |  |      |              |      |      |              |
| Highschool or higher     |  |      |              |      |      |              |
| Maternal BMI             |  |      |              |      |      |              |
| Underweight              |  |      |              |      |      |              |
| Normal                   |  |      |              |      |      |              |
| Overweight               |  |      |              |      |      |              |
| Obese                    |  |      |              |      |      |              |
| Maternal height          |  |      |              |      |      |              |
| ≥ 155cm                  |  | 1.00 |              |      | 1.00 |              |

|                               |             |             |              |             |      |              |      |
|-------------------------------|-------------|-------------|--------------|-------------|------|--------------|------|
| ≥150 & <155cm                 |             | 1.45        | (0.98- 2.15) | 0.08        | 1.52 | (1.02- 2.26) | 0.04 |
| <150cm                        |             | 2.15        | (1.19- 3.89) | 0.01        | 2.23 | (1.29- 4.35) | 0.01 |
| Maternal age at birth         |             |             |              |             |      |              |      |
| >40yrs                        |             |             |              |             |      |              |      |
| 30-39yrs                      |             |             |              |             |      |              |      |
| 20-29yrs                      |             |             |              |             |      |              |      |
| <20yrs                        |             |             |              |             |      |              |      |
| <b>Village Assembly (MOR)</b> | <b>1.59</b> | <b>1.53</b> |              | <b>1.55</b> |      |              |      |

Table 6 Multi-level [logistic regression analysis](#) for child wasting and community-households- and individual-level factors.

| Factor                  | Null model |        |         | Model 1 |        |         | Model 2 |               |         |
|-------------------------|------------|--------|---------|---------|--------|---------|---------|---------------|---------|
|                         | OR         | 95% CI | p-value | aOR     | 95% CI | p-value | aOR     | 95% CI        | p-value |
| <b>Individual Level</b> |            |        |         |         |        |         |         |               |         |
| Child's birth order     |            |        |         |         |        |         |         |               |         |
| First                   |            |        |         |         |        |         |         |               |         |
| Second                  |            |        |         |         |        |         |         |               |         |
| ≥Third                  |            |        |         |         |        |         |         |               |         |
| Sex of child            |            |        |         |         |        |         |         |               |         |
| Female                  |            |        |         |         |        |         | 1.00    |               |         |
| Male                    |            |        |         |         |        |         | 0.54    | (0.25- 1.19)  | 0.13    |
| Child's age             |            |        |         |         |        |         |         |               |         |
| 0-5 months              |            |        |         |         |        |         | 1.00    |               |         |
| 6-23 months             |            |        |         |         |        |         | 1.15    | (0.36-3.72)   | 0.81    |
| 24-59 months            |            |        |         |         |        |         | 0.38    | ( 0.11- 1.31) | 0.13    |
| Ever breastfed          |            |        |         |         |        |         |         |               |         |
| No                      |            |        |         |         |        |         |         |               |         |
| Yes                     |            |        |         |         |        |         |         |               |         |

|                          |
|--------------------------|
| Diarrhoea past 2 weeks   |
| No                       |
| yes                      |
| <b>Household Level</b>   |
| Wealth quintiles         |
| Lowest                   |
| Second                   |
| Third                    |
| Fourth                   |
| Highest                  |
| No. Household members    |
| ≤5                       |
| >5                       |
| Food Security            |
| Food Insecure            |
| Food Secure              |
| Drinking water source    |
| Improved                 |
| Unimproved               |
| Toilet facility          |
| Improved                 |
| Unimproved               |
| Maternal education level |
| Primary or lower         |
| Highschool or higher     |
| Paternal education level |
| Primary or lower         |
| Highschool or higher     |

|                               |             |                   |      |                   |      |  |
|-------------------------------|-------------|-------------------|------|-------------------|------|--|
| Maternal BMI                  |             |                   |      |                   |      |  |
| Underweight                   |             |                   |      |                   |      |  |
| Normal                        |             |                   |      |                   |      |  |
| Overweight                    |             |                   |      |                   |      |  |
| Obese                         |             |                   |      |                   |      |  |
| Maternal height               |             |                   |      |                   |      |  |
| ≥ 155cm                       |             | 1.00              |      | 1.00              |      |  |
| ≥150 & <155cm                 |             | 2.32 (1.08- 4.99) | 0.05 | 2.17 (1.00- 4.74) | 0.05 |  |
| <150cm                        |             | 0.46 (0.06- 3.67) | 0.47 | 0.42 (0.05- 3.37) | 0.41 |  |
| Maternal age at birth         |             |                   |      |                   |      |  |
| >40yrs                        |             |                   |      |                   |      |  |
| 30-39yrs                      |             |                   |      |                   |      |  |
| 20-29yrs                      |             |                   |      |                   |      |  |
| <20yrs                        |             |                   |      |                   |      |  |
| <b>Village Assembly (MOR)</b> | <b>1.04</b> | <b>1.10</b>       |      | <b>1.40</b>       |      |  |

Table 7 Multi-level [logistic regression analysis](#) for child underweight and community-households- and individual-level factors.

| Factor              | Null model |        |         | Model 1 |        |         | Model 2           |        |         |
|---------------------|------------|--------|---------|---------|--------|---------|-------------------|--------|---------|
|                     | OR         | 95% CI | p-value | aOR     | 95% CI | p-value | aOR               | 95% CI | p-value |
| Individual Level    |            |        |         |         |        |         |                   |        |         |
| Child's birth order |            |        |         |         |        |         |                   |        |         |
| First               |            |        |         |         |        |         | 1.00              |        |         |
| Second              |            |        |         |         |        |         | 1.92 (1.09- 3.36) |        | 0.02    |
| ≥Third              |            |        |         |         |        |         | 6.77 (2.00-22.82) |        | <0.01   |
| Sex of child        |            |        |         |         |        |         |                   |        |         |
| Female              |            |        |         |         |        |         |                   |        |         |
| Male                |            |        |         |         |        |         |                   |        |         |
| Child's age         |            |        |         |         |        |         |                   |        |         |

|                        |      |              |      |                   |      |
|------------------------|------|--------------|------|-------------------|------|
| 0-5 months             |      |              | 1.00 |                   |      |
| 6-23 months            |      |              | 4.83 | (1.36- 17.24)     | 0.02 |
| 24-59 months           |      |              | 4.59 | (1.29- 16.26)     | 0.02 |
| Ever breastfed         |      |              |      |                   |      |
| No                     |      |              |      |                   |      |
| Yes                    |      |              |      |                   |      |
| Diarrhoea past 2 weeks |      |              |      |                   |      |
| No                     |      |              |      |                   |      |
| yes                    |      |              |      |                   |      |
| <b>Household Level</b> |      |              |      |                   |      |
| Wealth quintiles       |      |              |      |                   |      |
| Lowest                 |      |              |      |                   |      |
| Second                 |      |              |      |                   |      |
| Third                  |      |              |      |                   |      |
| Fourth                 |      |              |      |                   |      |
| Highest                |      |              |      |                   |      |
| No. Household members  |      |              |      |                   |      |
| ≤5                     |      |              |      |                   |      |
| >5                     |      |              |      |                   |      |
| Food Security          |      |              |      |                   |      |
| Food Insecure          |      |              |      |                   |      |
| Food Secure            |      |              |      |                   |      |
| Drinking water source  |      |              |      |                   |      |
| Improved               | 1.00 |              | 1.00 |                   |      |
| Unimproved             | 1.74 | (1.06- 2.87) | 0.03 | 1.97 (1.19- 3.29) | 0.01 |
| Toilet facility        |      |              |      |                   |      |
| Improved               | 1.00 |              | 1.00 |                   |      |
| Unimproved             | 1.98 | (1.10- 3.56) | 0.02 | 2.11 (1.16- 3.82) | 0.01 |

|                               |             |                    |  |      |                    |      |
|-------------------------------|-------------|--------------------|--|------|--------------------|------|
| Maternal education level      |             |                    |  |      |                    |      |
| Primary or lower              |             | 1.00               |  |      |                    |      |
| Highschool or higher          |             | 0.65 ( 0.36-1.17)  |  | 0.15 |                    |      |
| Paternal education level      |             |                    |  |      |                    |      |
| Primary or lower              |             |                    |  |      |                    |      |
| Highschool or higher          |             |                    |  |      |                    |      |
| Maternal BMI                  |             |                    |  |      |                    |      |
| Underweight                   |             |                    |  |      |                    |      |
| Normal                        |             |                    |  |      |                    |      |
| Overweight                    |             |                    |  |      |                    |      |
| Obese                         |             |                    |  |      |                    |      |
| Maternal height               |             |                    |  |      |                    |      |
| ≥ 155cm                       |             | 1.00               |  |      | 1.00               |      |
| ≥150 & <155cm                 |             | 1.51 (0.90- 2.53)  |  | 0.11 | 1.68 (0.99- 2.84)  | 0.06 |
| <150cm                        |             | 0.58 ( 0.22- 1.52) |  | 0.27 | 0.49 (0.18- 1.34)  | 0.17 |
| Maternal age at birth         |             |                    |  |      |                    |      |
| >40yrs                        |             | 1.00               |  |      | 1.00               |      |
| 30-39yrs                      |             | 0.50 (0.15- 1.72)  |  | 0.27 | 0.41 (0.12- 1.43)  | 0.16 |
| 20-29yrs                      |             | 0.62 (0.19- 2.02)  |  | 0.43 | 0.51 ( 0.15- 1.68) | 0.27 |
| <20yrs                        |             | 1.41 (0.37- 5.32)  |  | 0.62 | 1.52 (0.40- 5.86)  | 0.54 |
| <b>Village Assembly (MOR)</b> | <b>1.27</b> | <b>1.36</b>        |  |      | <b>1.34</b>        |      |
